# Supplementary material for: Prediction of Maxillary Bone Invasion in Hard Palate/Upper Alveolus Cancer: A Multi-Center Retrospective Study
Source: MDPI journal article supplement (doi:10.3390/cancers15194699), 2023-09-24
Supplement: s1 [file s1]

**Supplementary Table S1.** Comparison of clinical characteristics between the participating centers.

|                                                                    | SMC                                | AMC                                 | Ajou                             | <i>p</i> -value |
|--------------------------------------------------------------------|------------------------------------|-------------------------------------|----------------------------------|-----------------|
| Patients No.(%)                                                    | 84 (58.3)                          | 46 (32.0)                           | 14 (9.7)                         | 144<br>(100.0)  |
| Age (years, mean $\pm$ SD)                                         | 57.6 $\pm$ 13.3                    | 54.1 $\pm$ 16.6                     | 60.0 $\pm$ 18.2                  | 0.345           |
| Sex (male: female) (No., %)                                        | 38: 46<br>(45.2: 54.8)             | 23: 23<br>(50.0: 50.0)              | 6: 8<br>(42.9: 57.1)             | 0.837           |
| Histology (No., %)<br>(SCC: minor salivary<br>carcinoma: melanoma) | 38: 39: 7<br>(45.2: 46.7: 8.<br>3) | 13: 26: 7<br>(28.3: 56.5: 31<br>.9) | 9: 4: 1<br>(64.3: 28.6: 7.<br>1) | 0.120           |
| Tumor site (No., %)<br>(hard palate: upper alveolus)               | 67: 17<br>(79.8: 20.2)             | 40: 6<br>(87.0: 13.0)               | 11: 3<br>(78.6: 21.4)            | 0.560           |
| Pathologic bone invasion<br>(No., %)                               | 37 (44.0)                          | 27 (58.7)                           | 6 (42.9)                         | 0.252           |

Abbreviations: SMC, Samsung Medical Center; AMC, Asan Medical Center; Ajou, Ajou Medical Center; SCC, squamous cell carcinomas.

**Supplementary Table S2.** MBI prediction models developed by multivariable logistic regression analysis in the patients with primary bone (HP/UA) resection for HP/UA cancer.

| Predictor variables                          |                                                   | Model 1<br>( <i>n</i> = 144) | Model 5<br>( <i>n</i> = 71) | Model 6<br>( <i>n</i> = 44) |
|----------------------------------------------|---------------------------------------------------|------------------------------|-----------------------------|-----------------------------|
| Adjusted odds ratio [95% CI]                 | CT bone invasion                                  | 13.049<br>[5.829, 29.214]    | 4.536<br>[1.076, 19.115]    | 12.111<br>[1.238, 118.465]  |
|                                              | Tumor long axis (cut-off value = 2.0, or 1.8 cm)  |                              |                             |                             |
|                                              | Tumor area (cut-off value = 4.0 cm <sup>2</sup> ) |                              | 3.064<br>[0.729, 12.875]    | 4.874<br>[0.682, 34.823]    |
|                                              | Sex (male vs. female)                             |                              | 2.103<br>[0.601, 7.361]     | 2.33<br>[0.376, 14.425]     |
|                                              | Lymph node metastasis (cN+ vs. cN0)               |                              | 0.94<br>[0.268, 3.299]      | 2.991<br>[0.378, 23.679]    |
|                                              | PET SUVmax (cut-off value = 6.0)                  |                              |                             | 2.666<br>[0.356, 19.950]    |
| AUC [95% CI]                                 |                                                   | 0.779<br>[ 0.712, 0.847]     | 0.8045<br>[0.6879, 0.921]   | 0.8548<br>[0.7027, 1.000]   |
| AUC [95% CI] from internal validation        |                                                   |                              | 0.7328<br>[0.4819, 0.973]   | 0.7118<br>[0.3453, 0.990]   |
| Brier score <sup>a</sup>                     |                                                   | 0.168                        |                             |                             |
| <i>P</i> Value by DeLong's test <sup>b</sup> |                                                   | Ref                          | 0.0310                      | 0.1933                      |

<sup>a</sup> Brier score: the value of the Brier score is between 0.0 and 1.0, where a model with perfect prediction has a score of 0.0 and the worst has a score of 1.0.

<sup>b</sup> Comparison of AUC by DeLong's test

Abbreviations: AUC: Area under receiver operating characteristics curve; CI: confidence interval.

[END]
